# Supplementary material for: Technical note: Bathymetry observations of inland water bodies using a tethered single-beam sonar controlled by an unmanned aerial vehicle
Source: Copernicus journal article supplement (doi:10.5194/hess-22-4165-2018), 2018-08-07
Supplement: Supplementary file 1 [file error_propagation.xlsx]

## Sheet: error propagation equations
								Δf is the maximum error on the function f
		Generic formula						Δxi is the error on the variable xi of the function f
								N is the number of variables (xi) of f
		Formula			eq.				maximum Error estimation
					1
					3
					5
					6
					7
					8
					9
		Northing_sonar=GNSS_northing+y							ΔNorthing=ΔGNSS_horiz+Δy				ΔGNSS_horiz (horizontal accuracy GNSS system)
		Easting_sonar=GNSS_easting+x							ΔEasting=ΔGNSS_horiz+Δx

## Sheet: uncertainty WFOV and Lw 
Generic formula
error propagation
maximum error
OD [m]	ΔOD [%]	ΔOD [m]
5	0.005	0.025									EX 3
					exAMPLE 1			EX2
F [m]	W sens [m]	H sens [m]	n_pix_w		pix_w			pix_w			pix_w
0.0104	0.0132	0.0088	5505		100			500			1000
6.34615	[m]				0.11528	[m]		0.576399			1.1528
Δ(WFOV)=Wsens*Δ(OD)/F					Δ(Lw)=(pix_w/n_pix_w)*Δ(WFOV)			Δ(Lw)=(pix_w/n_pix_w)*Δ(WFOV)			Δ(Lw)=(pix_w/n_pix_w)*Δ(WFOV)
0.0317308	[m]				0.000576399			0.002882			0.00576399			small error due to OD but Lw and Lh have 3% uncertainty due to uncorrected lens distorsion, focus and focal length not equal to image distance (distance between lens and image plane)

## Sheet: uncertainy on φ, L and x-y
Generic formula
error propagation
maximum error
	L (offset between camera and sonar on the horizontal plane)
Lh [m]	Lw [m]	L (max) [m]							Lh and Lw error (%)
1	1.73205	2							0.03
Δ Lh [m]	ΔLw [m]								φ=arctg(Lw/Lh)		min φ		max φ
0.03	0.0519615								1.0472		58.4891		61.4663
									rad		degree		degree
Δ phi [rad]									60
0.0259808									degree
Δ phi [degree]		β [rad]				α [rad]
1.48859		2				3.0472
								Δβ [rad]		0.0523599	rad
		sin(90-alpha)	cos(90-alpha)					Δβ[grad]		3	grad
		-0.995548	0.094255					Δα [rad]		0.0783406	rad
								Δα[grad]		4.48859	grad
Δ L [m]		Δ sin(90- α)	Δ cos(90- α)
0.06		0.007384	0.0779919
	y [m]			Δy [m]
	-1.9911			0.0745009
	x [m]			Δx [m]
	0.18851			0.161639
		Absolute sonar coordinates
ΔGNSS_horiz (horizontal accuracy GNSS system)	0.02
			Δ northing position sonar [m]
			0.0945009
			Δ easting [m]
			0.181639
