# Supplementary material for: Technical note: Bathymetry observations of inland water bodies using a tethered single-beam sonar controlled by an unmanned aerial vehicle
Source: Copernicus journal article supplement (doi:10.5194/hess-22-4165-2018), 2018-08-07
Supplement: Supplementary file [file hess-22-4165-2018-supplement-title-page.pdf › hess-22-4165-2018-supplement-title-page.pdf]

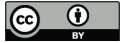

*Supplement of*

**Technical note: Bathymetry observations of inland water  
bodies using a tethered single-beam sonar controlled by  
an unmanned aerial vehicle**

**Filippo Bandini et al.**

*Correspondence to:* Filippo Bandini (fban@env.dtu.dk)

- [hess-22-4165-2018-supplement-title-page.pdf](#)
- [error\\_propagation.xlsx](#)

The copyright of individual parts of the supplement might differ from the CC BY 4.0 License.
